# Supplementary material for: S-acylation is involved in tonoplast targeting of flax resistance protein M
Source: bioRxiv or medRxiv preprint supplement (doi:10.1101/2020.07.01.181701), 2020-07-02
Supplement: Supplementary file [file media-1.pdf]

## Supporting Information

### Figure S1

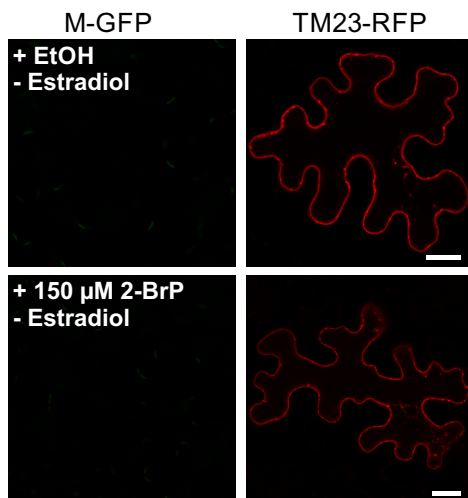

#### Targeting of TM23-RFP in presence of 2-BrP

TM23-RFP and M-GFP were co-transformed in *N. benthamiana* leaves. M-GFP (shown in the left images), under the control of the Estradiol promoter, was not expressed since Estradiol was omitted. TM23-RFP (shown in the right images) is targeted to the plasma membrane and vesicles in absence of 2-BrP (EtOH solvent control in the upper images) and presence of 150 μM 2-BrP (lower images). Bar represents 20 μm.

## Supporting Information

### Figure S2

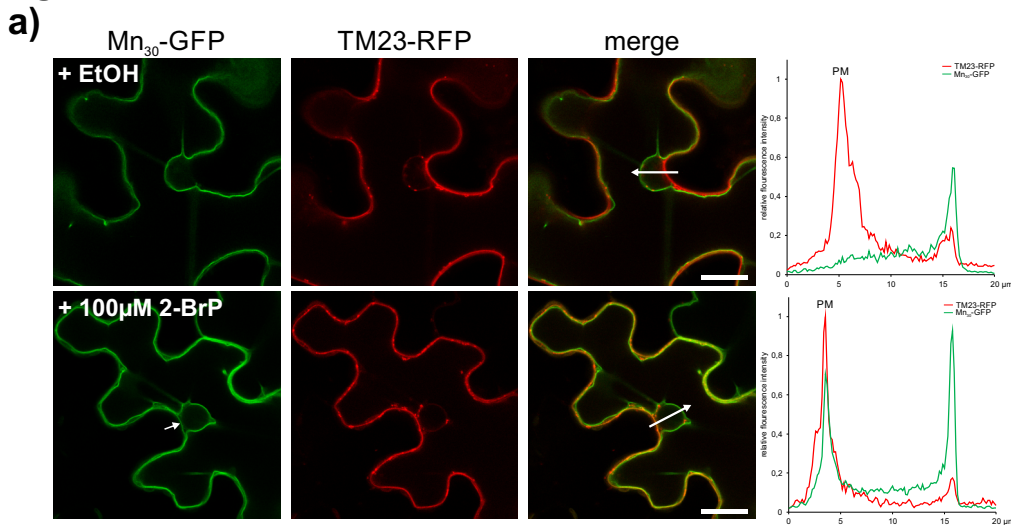

#### a) Targeting of Mn<sub>30</sub>-GFP in absence and presence of 2-BrP.

The first 30 amino acids of M fused to GFP (Mn<sub>30</sub>-GFP) (first column), was co-expressed with the plasma membrane marker TM23-RFP in *N. benthamiana* leaves. Samples were either incubated in the presence of EtOH control solution (first row) or 100 μM 2-BrP (second row). In presence of the EtOH control solution, Mn<sub>30</sub>-GFP associates with the tonoplast and not with the plasma membrane, but partially targets to the plasma membrane in presence of 2-BrP (indicated by an arrow in the Mn<sub>30</sub>-GFP image). The fluorescence intensity was measured within the region of interest (indicated by the arrow in the merged picture) and is depicted in the right graph (PM indicates the position of the plasma membrane). The scale bars depicted in the overlay images are 20 μm.

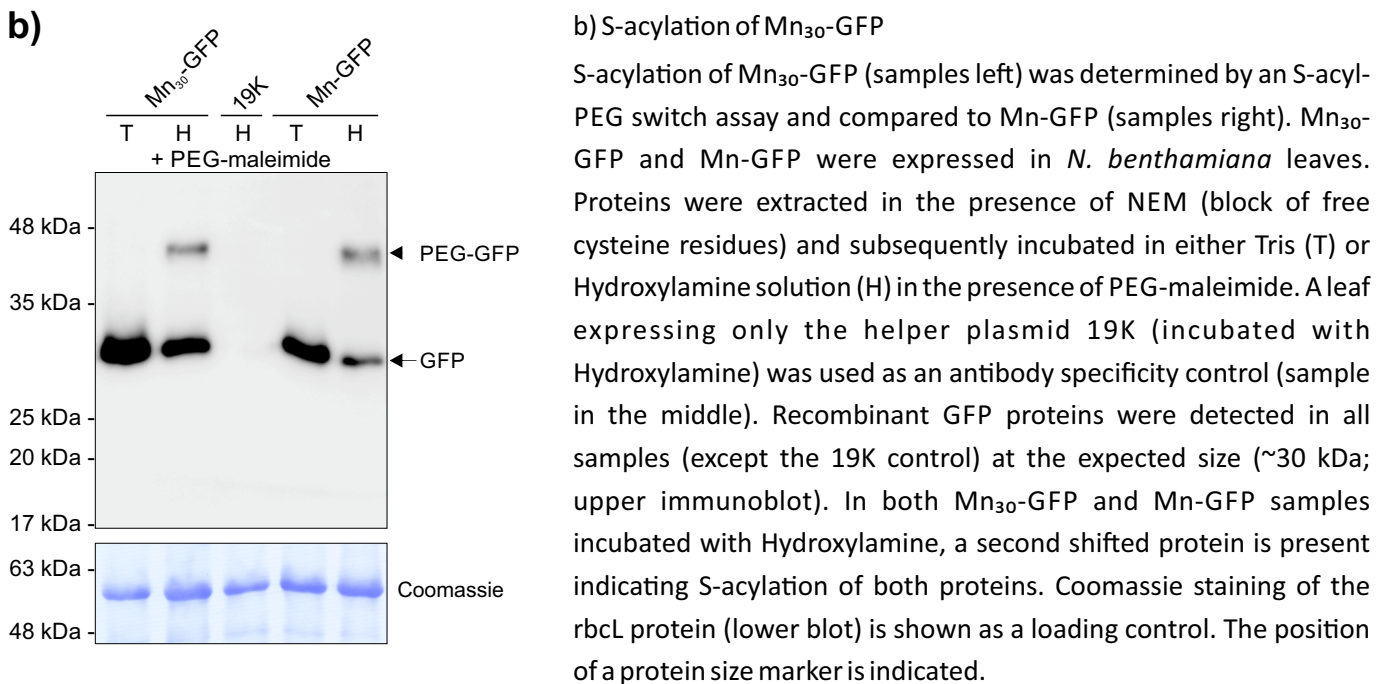



## Supporting Information

### Figure S3 (continued)

b)

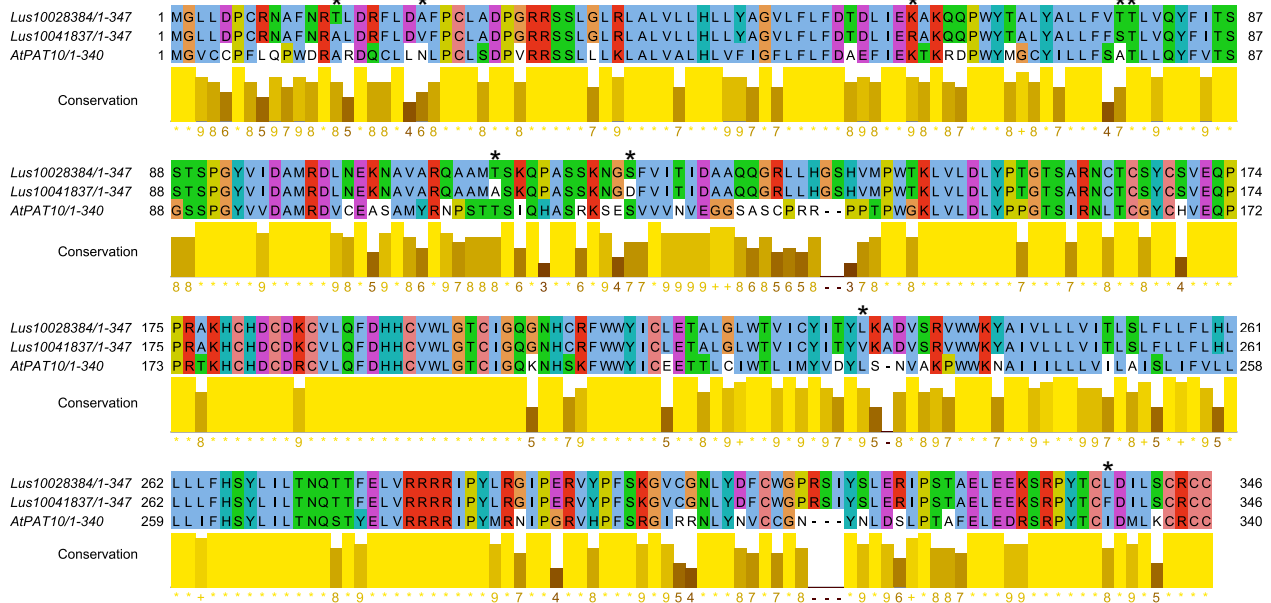

b) Alignment of flax and *Arabidopsis* PAT10

Alignment of the two *L. ussitatissimum* PAT10 annotations (*LuPAT10a*/*Lus10028384* and *LuPAT10b*/*Lus10041837*) and *A. thaliana* PAT10 (*AtPAT10*). The amino acid discrepancies between *LuPAT10a* and *LuPAT10b* are indicated by an asterisk. Amino acids are coloured using the Clustal-X colour scheme. Yellow columns below the sequences indicate amino acid conservation.

c)

|              |                 | % identity      |                 |                |
|--------------|-----------------|-----------------|-----------------|----------------|
|              |                 | <i>LuPAT10a</i> | <i>LuPAT10b</i> | <i>AtPAT10</i> |
| % similarity | <i>LuPAT10a</i> | -               | 97,4            | 58,1           |
|              | <i>LuPAT10b</i> | 98,3            | -               | 57,2           |
|              | <i>AtPAT10</i>  | 73,7            | 73,4            | -              |

c) Similarity and identity between *LuPAT10a/b* and *AtPAT10*

Protein similarity (orange background) and identity (green background) compared between *LuPAT10a*, *LuPAT10b* and *AtPAT10*.

## Supporting Information

### Figure S4

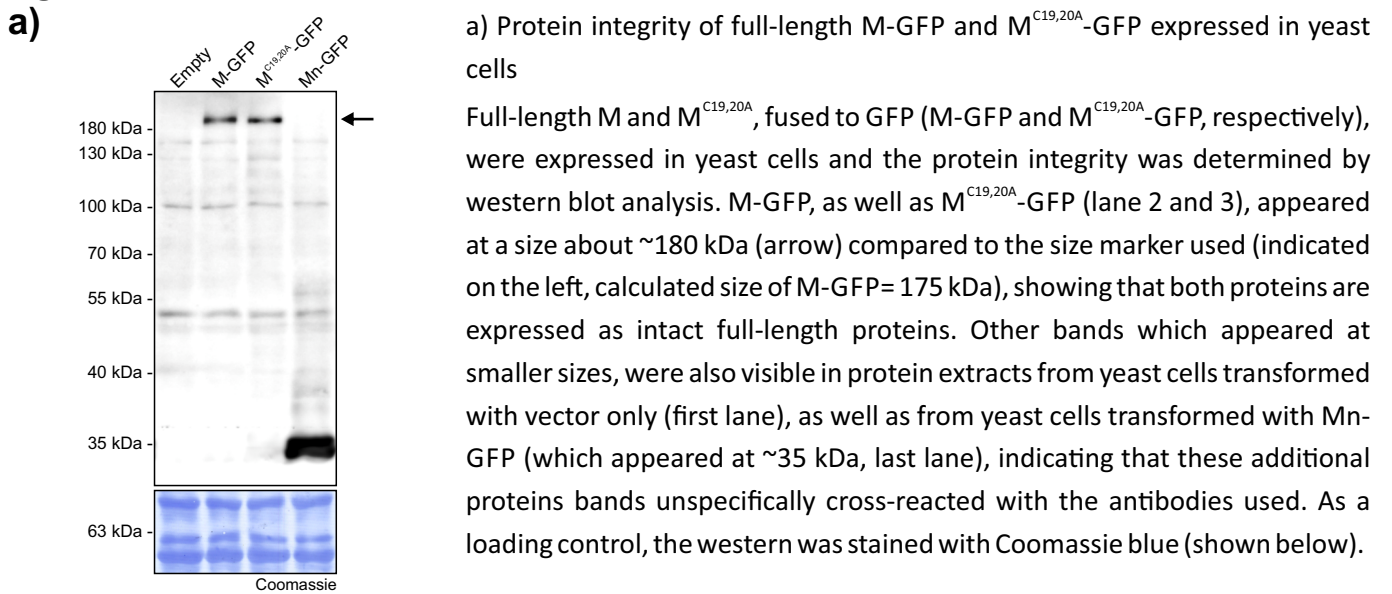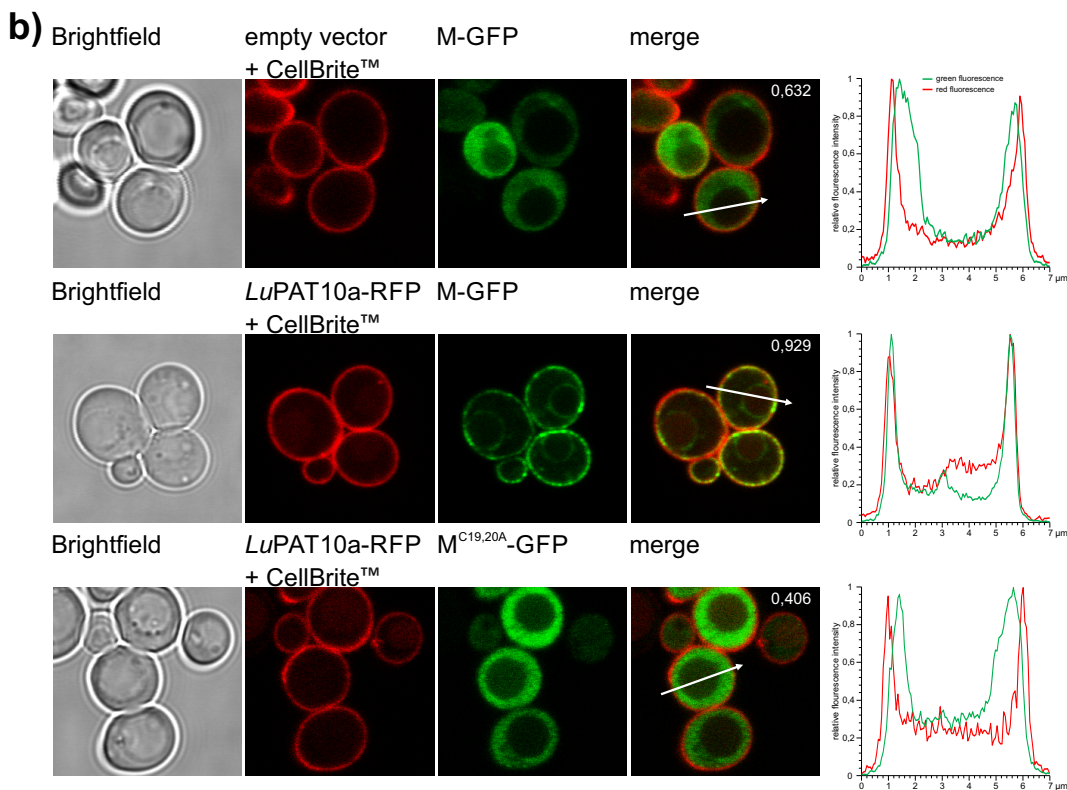

## Supporting Information

### Figure S5

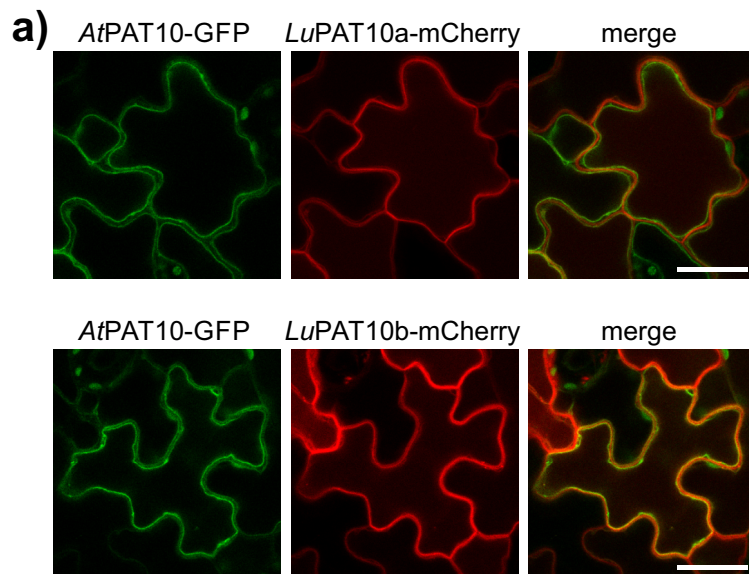

**a)** Localization of *Arabidopsis* PAT10 and flax PAT10a/b in *A. thaliana* seedlings

*A. thaliana* PAT10 fused to GFP (*AtPAT10-GFP*) and *LuPAT10a*, as well as *LuPAT10b*, fused to RFP (*LuPAT10a/b-RFP*), were transiently co-expressed in *Arabidopsis* WT seedlings. *AtPAT10* (first image) is targeted to the tonoplast and vesicles, while *LuPAT10a* (second image, first row) and *LuPAT10b* (second row) mainly target to the plasma membrane. A merge of the fluorescences is shown in the third image. The scale bar in the merged picture represents 20  $\mu\text{m}$ .

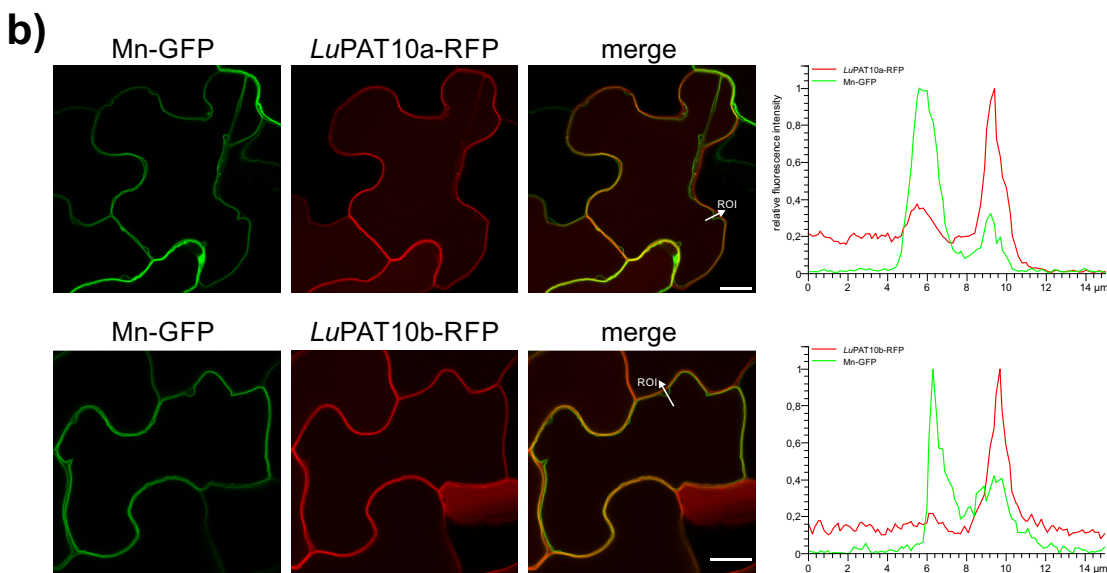

**b)** Localization of flax M-n and PAT10a/b in flax seedlings

Flax M N-terminus fused to GFP (*Mn-GFP*) and flax PAT10a/b fused to RFP (*LuPAT10a/b-RFP*) were transiently co-expressed in flax seedlings. *Mn-GFP* (first image) is mainly targeted to the vacuolar membrane, while *LuPAT10a* (second image, first row) and *LuPAT10b* (second image, second row) mainly targeted to the plasma membrane and partially to the vacuolar membrane. Fluorescence intensity was determined within the indicated region of interest (arrow) and is depicted in the right graph. The scale bars in the merged images represent 20  $\mu\text{m}$ .
